# Supplementary material
Source: PubMed Central journal article supplement (PMC10127592)
Supplement: jb.00039-23-s0001.pdf [file jb.00039-23-s0001.pdf]

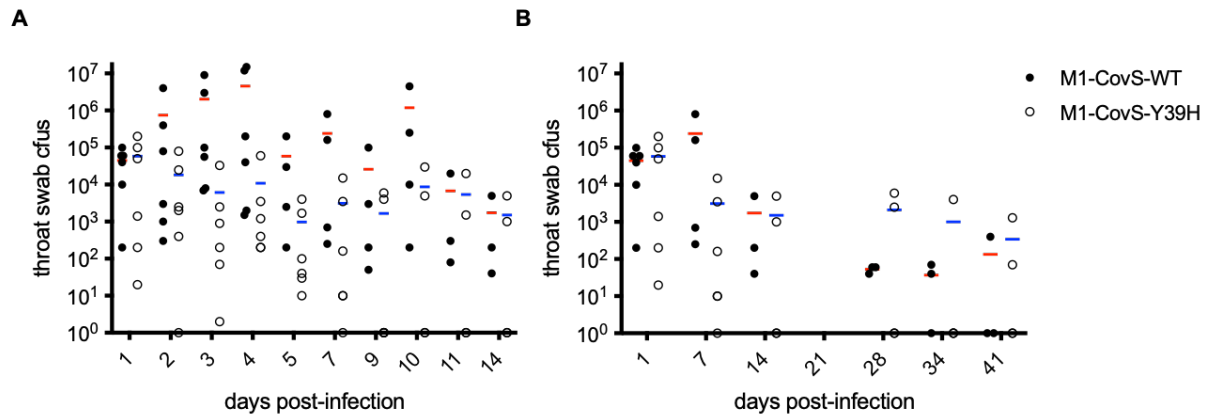

1  
2 **Figure S1. The M1-CovS- Y39H strain lasts more than the M1-CovS-WT mutant strain**  
3 **in mouse throat.** Mice were infected with M1-CovS-WT and M1-CovS-Y39H strains.  
4 intranasally (n = 6) with  $5 \times 10^8$  and  $1.2 \times 10^9$  cfus, respectively. Intranasal and throat swabs  
5 were carried out daily until day 5. *S. pyogenes*, as attested by numbering cfus on plates, were  
6 found in both intranasally and in the throat (not shown for the intranasal samplings). Then only  
7 throat swabs were done, every other day until day 14 and then weekly. **A)** Swabs from days 1  
8 to 14, **B)** swabs from days 1 to 41, indicating only the weekly values. Median values are  
9 indicated by, a red dash for the M1-CovS-WT strain and a blue one for the M1-CovS-Y39H  
10 strain.  
11

12 **Table S1. Primer sequences**

| Oligonucleotides | Sequence (5'→3')                            | Target gene |
|------------------|---------------------------------------------|-------------|
| gyrA1            | GCCATGAGTGTTCATTGTGGC                       | <i>gyrA</i> |
| gyrA2            | GGCGATAACTCCACCACTGA                        |             |
| speA1            | CGCAAGAGGTATTTGCTCAA                        | <i>speA</i> |
| speA2            | GCCATCTCTTGGTTCTTAAG                        |             |
| speB1            | CCGCTGGTAGAGTATCCTA                         | <i>speB</i> |
| speB2            | GCTAACCCAGTATTTGCCG                         |             |
| grab3            | GGCCGTAATATTACTTTTCGGAG                     | <i>grab</i> |
| grab4            | GCTACAGTTTATAATAGCTTGAAAGAC                 |             |
| has1             | GGAACATCAACTGTAGGAATTTAT                    | <i>hasA</i> |
| has2             | GCATCTGTGTTTGA ACTCC                        |             |
| skal             | GCACTGCTGTTTGCATTAAC                        | <i>ska</i>  |
| ska2             | GCAAATGGTTTTGATTTTGGACT                     |             |
| gasslo_F         | ACCGTATCAGCAAACCTTCCT                       | <i>slo</i>  |
| gasslo_R         | ACTAAAGGCCGCTTCAACATC                       |             |
| CovSF            | <i>CGACTCTAGAGGATCCGGGTTAGAACTGCTTTGGA</i>  | <i>covR</i> |
| CovSR            | <i>CCATGATTACGAATTCCGGTGTTTCGTAATTCATGG</i> | <i>covS</i> |
| F_Cov            | CGCTAGAAGACTATTTGACCA                       | <i>covR</i> |
| R_Cov            | CCTTGTACGCGAATCATGT                         | <i>covS</i> |

13 The letters in italic correspond to the nucleotide required for the “In fusion” cloning.

14

15 **Table S2. RNAseq analysis of *Streptococcus pyogenes* M1-CovS-WT and M1-Cov-Y39H**  
 16 **transcript abundance in THY broth or THY supplemented by 15 mM Mg<sup>++</sup>.**

17 a) Genes differentially expressed in M1-CovS-Y39H/ M1-CovS-WT comparisons (un-supplemented THY)  
 18 with Foldchange (FC) >2 and adjusted p-values < 0.05

| S119        | SF370    | locus       | M1-CovS-Y39H/<br>M1-CovS-WT<br>(Log2 FC) | M1-CovS-Y39H/<br>M1-CovS-WT<br>(adj pvalue) | M1-CovS-WT:<br>Mg <sup>2+</sup> /THY<br>(Log2 FC) | M1-CovS-WT:<br>Mg <sup>2+</sup> /THY<br>(adj pvalue) | M1-CovS-Y39H:<br>Mg <sup>2+</sup> /THY<br>(Log2 FC) | M1-CovS-Y39H:<br>Mg <sup>2+</sup> /THY<br>(adj pvalue) | Hypothetical/proposed function                                                            |
|-------------|----------|-------------|------------------------------------------|---------------------------------------------|---------------------------------------------------|------------------------------------------------------|-----------------------------------------------------|--------------------------------------------------------|-------------------------------------------------------------------------------------------|
| SP119_0139  | SPy_0167 | <i>slo</i>  | -2.9                                     | 2.43E-06                                    | -3.1                                              | 1.59E-09                                             | 0.0                                                 | 1.00                                                   | streptolysin O                                                                            |
| SP119_1170  | —        | <i>spd3</i> | -2.4                                     | 0.0003                                      | -2.6                                              | 5.57E-06                                             | -0.4                                                | 0.93                                                   | DNase                                                                                     |
| SP119_1403  | SPy_1718 | —           | -2.0                                     | 0.0140                                      | -1.8                                              | 0.0037                                               | 0.0                                                 | 1.00                                                   | alpha/beta hydrolase fold family protein                                                  |
| SP119_1480  | SPy_1743 | <i>accA</i> | -1.7                                     | 0.0002                                      | -1.9                                              | 1.75E-06                                             | -0.2                                                | 0.96                                                   | acetyl-CoA carboxylase, carboxyl transferase, alpha subunit                               |
| SP119_1665  | SPy_1979 | <i>ska</i>  | -1.7                                     | 0.0007                                      | -1.2                                              | 0.0052                                               | -0.5                                                | 0.79                                                   | streptokinase C                                                                           |
| SP119_1694  | —        | <i>sic</i>  | -1.6                                     | 0.0024                                      | -3.3                                              | 5.20E-13                                             | 0.3                                                 | 0.95                                                   | sic family protein                                                                        |
| SP119_0578  | —        | —           | -1.5                                     | 0.0006                                      | -2.0                                              | 8.88E-09                                             | 0.2                                                 | 0.96                                                   | transposase IS116/IS110/IS902 family protein                                              |
| SP119_1078  | SPy_1316 | <i>glnQ</i> | -1.4                                     | 0.0037                                      | -1.4                                              | 0.0019                                               | -0.7                                                | 0.65                                                   | ABC transporter family protein                                                            |
| SP119_1686  | SPy_2004 | <i>dppE</i> | -1.4                                     | 0.0002                                      | -1.3                                              | 0.0001                                               | -0.3                                                | 0.89                                                   | ABC transporter family protein                                                            |
| SP119_0579  | —        | —           | -1.4                                     | 0.0494                                      | -1.4                                              | 0.0108                                               | 0.1                                                 | 0.99                                                   | hypothetical protein                                                                      |
| SP119_1691  | SPy_2009 | <i>fbxA</i> | -1.4                                     | 0.0002                                      | -2.5                                              | 2.37E-15                                             | -0.2                                                | 0.96                                                   | LPXTG-motif cell wall anchor domain protein                                               |
| SP119_1683  | SPy_2001 | <i>dppB</i> | -1.4                                     | 0.0009                                      | -1.4                                              | 0.0001                                               | -0.1                                                | 0.98                                                   | binding--dependent transport system inner membrane component family protein               |
| SP119_1692  | SPy_2010 | <i>scpA</i> | -1.3                                     | 0.0018                                      | -2.0                                              | 3.72E-08                                             | -0.6                                                | 0.70                                                   | C5a peptidase                                                                             |
| SP119_0581  | —        | —           | -1.3                                     | 0.0166                                      | -1.5                                              | 0.0014                                               | -0.5                                                | 0.79                                                   | mga helix-turn-helix domain protein                                                       |
| SP119_0333b | —        | <i>spyB</i> | -1.3                                     | 0.0472                                      | -2.4                                              | 2.84E-06                                             | 0.6                                                 | 0.79                                                   | hypothetical protein                                                                      |
| SP119_1077  | SPy_1315 | <i>glnP</i> | -1.3                                     | 0.0009                                      | -1.2                                              | 0.0007                                               | -0.8                                                | 0.41                                                   | amino ABC transporter, permease, 3-TM region, His/Glu/Gln/Arg/opine family domain protein |
| SP119_1684  | SPy_2002 | <i>dppC</i> | -1.3                                     | 0.0112                                      | -1.7                                              | 0.0001                                               | -0.1                                                | 0.99                                                   | binding--dependent transport system inner membrane component family protein               |
| SP119_1481  | SPy_1744 | <i>accD</i> | -1.3                                     | 0.0004                                      | -1.6                                              | 6.51E-07                                             | -0.6                                                | 0.61                                                   | acetyl-CoA carboxylase, carboxyl transferase, beta subunit                                |
| SP119_0333  | SPy_0428 | <i>spyA</i> | -1.2                                     | 0.0318                                      | -2.5                                              | 8.01E-08                                             | 0.5                                                 | 0.75                                                   | clostridial binary toxin A family protein                                                 |
| SP119_0580  | —        | —           | -1.2                                     | 0.0106                                      | -1.4                                              | 0.0003                                               | -0.1                                                | 0.99                                                   | transcriptional regulator                                                                 |
| SP119_1588  | SPy_1877 | <i>glnA</i> | -1.2                                     | 0.0119                                      | -1.1                                              | 0.0137                                               | -0.5                                                | 0.72                                                   | glutamine synthetase, type I                                                              |
| SP119_1827  | SPy_2206 | <i>guaB</i> | -1.2                                     | 5.10E-07                                    | -1.1                                              | 8.59E-07                                             | 0.5                                                 | 0.41                                                   | inosine-5'-monophosphate dehydrogenase                                                    |
| SP119_1241  | SPy_1510 | <i>mutT</i> | -1.1                                     | 0.0498                                      | -1.4                                              | 0.0019                                               | -0.1                                                | 0.99                                                   | mutT/nudix family protein                                                                 |
| SP119_1271  | SPy_1544 | <i>arcB</i> | -1.1                                     | 0.0017                                      | 0.7                                               | 0.0583                                               | -0.3                                                | 0.75                                                   | ornithine carbamoyltransferase                                                            |
| SP119_1715  | SPy_2045 | —           | -1.1                                     | 0.0174                                      | -0.8                                              | 0.0767                                               | 0.7                                                 | 0.61                                                   | low temperature requirement C                                                             |
| SP119_1682  | SPy_2000 | <i>dppA</i> | -1.1                                     | 0.0012                                      | -0.3                                              | 0.4170                                               | -0.8                                                | 0.31                                                   | bacterial extracellular solute-binding s, 5 Middle family protein                         |
| SP119_0176  | SPy_0210 | —           | -1.1                                     | 0.0389                                      | -1.0                                              | 0.0196                                               | 0.1                                                 | 0.99                                                   | transglutaminase-like superfamily protein                                                 |
| SP119_0450  | SPy_0577 | —           | -1.1                                     | 0.0497                                      | -0.8                                              | 0.1169                                               | 0.6                                                 | 0.71                                                   | hypothetical protein                                                                      |
| SP119_0804  | SPy_1070 | —           | -1.0                                     | 0.0040                                      | -0.6                                              | 0.1516                                               | 0.2                                                 | 0.89                                                   | dipeptidase PepV                                                                          |
| SP119_1551  | SPy_1833 | <i>mutY</i> | -1.0                                     | 0.0115                                      | -1.0                                              | 0.0064                                               | 0.0                                                 | 1.00                                                   | A/G-specific adenine glycosylase                                                          |
| SP119_1752  | SPy_2095 | <i>pepO</i> | -1.0                                     | 0.0027                                      | -0.7                                              | 0.0505                                               | -0.2                                                | 0.90                                                   | endopeptidase                                                                             |
| SP119_0401  | SPy_0516 | —           | -1.0                                     | 0.0172                                      | -0.5                                              | 0.2601                                               | 0.1                                                 | 0.99                                                   | glycosyl transferases group 1 family protein                                              |
| SP119_1634  | SPy_1936 | <i>degV</i> | -1.0                                     | 0.0321                                      | -1.5                                              | 9.55E-05                                             | 0.6                                                 | 0.62                                                   | EDD, DegV family domain protein                                                           |
| SP119_0933  | SPy_1214 | <i>lplA</i> | 1.0                                      | 0.0416                                      | 2.0                                               | 3.72E-08                                             | -0.6                                                | 0.61                                                   | lipoyltransferase and lipolate-ligase family protein                                      |
| SP119_0681  | SPy_0854 | <i>pfkB</i> | 1.0                                      | 1.56E-05                                    | 1.6                                               | 2.37E-15                                             | -0.4                                                | 0.60                                                   | 1-phosphofructokinase                                                                     |
| SP119_0029  | SPy_0034 | <i>purK</i> | 1.0                                      | 0.0302                                      | 0.2                                               | 0.7158                                               | 0.6                                                 | 0.68                                                   | phosphoribosylaminoimidazole carboxylase, ATPase subunit                                  |
| SP119_1688  | SPy_2006 | —           | 1.1                                      | 0.0050                                      | 1.3                                               | 4.05E-05                                             | 0.1                                                 | 0.98                                                   | hypothetical protein                                                                      |
| SP119_0022  | SPy_0026 | <i>purF</i> | 1.1                                      | 0.0107                                      | 0.8                                               | 0.0578                                               | -0.1                                                | 0.98                                                   | amidophosphoribosyltransferase                                                            |
| SP119_0492  | SPy_0632 | <i>ugl</i>  | 1.1                                      | 0.0321                                      | -0.1                                              | 0.8369                                               | 0.0                                                 | 1.00                                                   | unsaturated glucuronyl hydrolase                                                          |
| SP119_0326  | SPy_0416 | <i>prtS</i> | 1.1                                      | 0.0112                                      | 1.4                                               | 0.0001                                               | -0.3                                                | 0.85                                                   | hypothetical protein                                                                      |
| SP119_0631  | SPy_0794 | —           | 1.1                                      | 0.0389                                      | 1.0                                               | 0.0315                                               | -0.1                                                | 0.99                                                   | glycosyl transferase 2 family protein                                                     |
| SP119_1105  | SPy_1355 | —           | 1.2                                      | 0.0275                                      | 0.6                                               | 0.2792                                               | -0.2                                                | 0.98                                                   | CBS domain pair family protein                                                            |
| SP119_1661  | SPy_1972 | <i>pulL</i> | 1.2                                      | 0.0028                                      | 2.0                                               | 6.83E-10                                             | -0.4                                                | 0.72                                                   | putative pullulanase                                                                      |
| SP119_0024  | SPy_0028 | <i>purN</i> | 1.2                                      | 0.0020                                      | 0.4                                               | 0.3075                                               | 0.0                                                 | 0.99                                                   | phosphoribosylglycinamide formyltransferase                                               |
| SP119_0034  | SPy_0039 | —           | 1.2                                      | 0.0435                                      | 0.5                                               | 0.3830                                               | 0.0                                                 | 1.00                                                   | low molecular weight phosphotyrosine phosphatase family protein                           |
| SP119_0446  | SPy_0572 | <i>bgIP</i> | 1.2                                      | 0.0140                                      | 1.5                                               | 0.0005                                               | 0.3                                                 | 0.92                                                   | PTS system, beta-glucoside-specific IIABC component family protein                        |
| SP119_1778  | SPy_2149 | —           | 1.2                                      | 0.0498                                      | 0.4                                               | 0.6099                                               | -0.6                                                | 0.75                                                   | hypothetical protein                                                                      |
| SP119_0629  | SPy_0792 | <i>rgpF</i> | 1.2                                      | 0.0140                                      | 0.7                                               | 0.1467                                               | -0.1                                                | 0.99                                                   | rhamnan synthesis F family protein                                                        |
| SP119_1067  | —        | <i>amyA</i> | 1.2                                      | 0.0112                                      | 0.2                                               | 0.7483                                               | -0.1                                                | 0.99                                                   | cyclomalto-dextrin glucanotransferase                                                     |
| SP119_1493  | SPy_1759 | <i>dnaJ</i> | 1.3                                      | 0.0112                                      | 0.4                                               | 0.4924                                               | -0.2                                                | 0.97                                                   | chaperone protein DnaJ                                                                    |
| SP119_0062  | SPy_0074 | <i>adk</i>  | 1.3                                      | 0.0106                                      | 1.0                                               | 0.0310                                               | -0.6                                                | 0.68                                                   | adenylate kinase                                                                          |
| SP119_1095  | SPy_1340 | —           | 1.3                                      | 0.0002                                      | 1.0                                               | 0.0031                                               | 0.5                                                 | 0.71                                                   | sugar (and other) transporter family protein                                              |
| SP119_0023  | SPy_0027 | <i>purM</i> | 1.4                                      | 2.02E-05                                    | 1.0                                               | 0.0009                                               | 0.0                                                 | 1.00                                                   | phosphoribosylformylglycinamide cyclo-ligase                                              |
| SP119_1058  | SPy_1292 | <i>malQ</i> | 1.4                                      | 0.0009                                      | 1.8                                               | 1.13E-07                                             | 0.1                                                 | 0.99                                                   | 4-alpha-glucanotransferase                                                                |
| SP119_0632  | SPy_0796 | —           | 1.4                                      | 0.0429                                      | 0.6                                               | 0.3668                                               | -0.1                                                | 0.99                                                   | putative membrane protein                                                                 |
| SP119_0445  | SPy_0571 | <i>licT</i> | 1.4                                      | 0.0101                                      | 1.2                                               | 0.0122                                               | 0.2                                                 | 0.94                                                   | transcription antiterminator LicT                                                         |
| SP119_0661  | SPy_0831 | <i>pyrP</i> | 1.4                                      | 0.0078                                      | 1.6                                               | 0.0014                                               | -0.2                                                | 0.99                                                   | uracil permease                                                                           |
| SP119_1069  | —        | <i>malX</i> | 1.4                                      | 0.0174                                      | 0.1                                               | 0.8749                                               | -0.8                                                | 0.71                                                   | maltose/maltodextrin-binding protein                                                      |
| SP119_1057  | SPy_1291 | <i>glgP</i> | 1.5                                      | 0.0040                                      | 2.3                                               | 2.20E-08                                             | -0.4                                                | 0.84                                                   | glycogen/starch/alpha-glucan phosphorylases family protein                                |
| SP119_0660  | SPy_0830 | <i>pyrR</i> | 1.5                                      | 0.0015                                      | 1.7                                               | 1.92E-05                                             | -0.1                                                | 0.99                                                   | bifunctional protein pyrR                                                                 |
| SP119_0949  | SPy_1232 | —           | 1.5                                      | 0.0127                                      | 0.8                                               | 0.2160                                               | 0.3                                                 | 0.96                                                   | methyltransferase small domain protein                                                    |
| SP119_0106  | SPy_0129 | <i>srIB</i> | 1.6                                      | 0.0017                                      | 1.3                                               | 0.0059                                               | 0.2                                                 | 0.95                                                   | sortase, SrtB family                                                                      |
| SP119_0125  | SPy_0149 | <i>ntpK</i> | 1.6                                      | 0.0392                                      | 2.5                                               | 8.46E-06                                             | 0.1                                                 | 0.99                                                   | V-type sodium ATPase subunit K                                                            |
| SP119_0103  | —        | <i>cpaI</i> | 1.7                                      | 6.05E-07                                    | 1.3                                               | 0.0002                                               | 0.0                                                 | 1.00                                                   | ancillary protein I                                                                       |
| SP119_0105  | —        | —           | 1.7                                      | 0.0078                                      | 1.4                                               | 0.0221                                               | -0.1                                                | 0.99                                                   | pilin                                                                                     |
| SP119_0720  | SPy_0900 | <i>pyrF</i> | 1.7                                      | 2.63E-06                                    | 1.2                                               | 0.0011                                               | -0.4                                                | 0.71                                                   | orotidine 5'-phosphate decarboxylase                                                      |
| SP119_0860  | —        | —           | 1.8                                      | 0.0038                                      | 1.1                                               | 0.0701                                               | 0.7                                                 | 0.71                                                   | putative short-chain dehydrogenase domain protein                                         |
| SP119_0695  | SPy_0872 | —           | 1.8                                      | 0.0010                                      | -0.3                                              | 0.6842                                               | 0.9                                                 | 0.60                                                   | calcineurin-like phosphoesterase family protein                                           |
| SP119_0721  | SPy_0901 | <i>pyrE</i> | 1.8                                      | 2.88E-05                                    | 1.3                                               | 0.0035                                               | -0.4                                                | 0.79                                                   | orate phosphoribosyltransferase                                                           |
| SP119_1621  | SPy_1917 | <i>lacE</i> | 1.9                                      | 0.0027                                      | 1.5                                               | 0.0151                                               | 0.3                                                 | 0.93                                                   | PTS system lactose-specific EIICB component                                               |
| SP119_1107  | SPy_1357 | <i>grab</i> | 1.9                                      | 8.59E-08                                    | 2.0                                               | 6.83E-10                                             | -0.3                                                | 0.85                                                   | immunoglobulin G-binding protein G                                                        |

|            |          |             |     |          |     |          |      |      |                                             |
|------------|----------|-------------|-----|----------|-----|----------|------|------|---------------------------------------------|
| SP119_0662 | SPy_0832 | <i>pyrB</i> | 2.0 | 2.26E-05 | 2.0 | 4.00E-06 | -0.8 | 0.61 | aspartate carbamoyltransferase              |
| SP119_0107 | SPy_0130 | —           | 2.0 | 0.0009   | 1.6 | 0.0046   | 0.0  | 1.00 | LPXTG-motif cell wall anchor domain protein |
| SP119_0104 | SPy_0127 | <i>lepB</i> | 2.1 | 0.0037   | 1.7 | 0.0154   | -0.2 | 0.99 | signal peptidase I                          |
| SP119_0664 | SPy_0835 | <i>carB</i> | 2.2 | 8.59E-08 | 1.8 | 2.61E-06 | -0.5 | 0.75 | carbamoyl-phosphate synthase, large subunit |
| SP119_0663 | SPy_0833 | <i>carA</i> | 2.2 | 8.59E-08 | 2.1 | 8.01E-08 | -0.4 | 0.75 | carbamoyl-phosphate synthase, small subunit |
| SP119_1709 | SPy_2038 | <i>spi</i>  | 2.4 | 5.16E-05 | 3.7 | 2.49E-12 | 0.8  | 0.71 | streptopain domain protein                  |
| SP119_1710 | SPy_2039 | <i>speB</i> | 2.4 | 0.0002   | 4.0 | 1.92E-12 | 0.6  | 0.79 | pyrogenic exotoxin B                        |
| SP119_1623 | SPy_1919 | <i>lacD</i> | 2.5 | 0.0002   | 1.9 | 0.0029   | -0.2 | 0.99 | tagatose 1,6-diphosphate aldolase           |
| SP119_1620 | SPy_1916 | <i>lacG</i> | 3.1 | 2.43E-06 | 2.1 | 0.0010   | -0.2 | 0.99 | 6-phospho-beta-galactosidase                |
| SP119_1712 | —        | —           | 3.3 | 0.0014   | 2.0 | 0.0678   | 1.3  | 0.60 | hypothetical protein                        |

20

21 b) Genes differentially expressed in Mg<sup>2+</sup> supplemented THY in M1-CovS-WT strain (FC>2 and adjusted  
 22 p-values ≤ 0.05) and with adjusted p-values < 0.05 but FC< 2 in M1-CovS-Y39H/ M1-CovS-WT  
 23 comparisons

| M1-CovS-WT (S119) | SF370    | locus       | M1-Cov-Y39H/ M1-CovS-WT (Log2 FC) | M1-Cov-Y39H/ M1-CovS-WT (adj pvalue) | M1-CovS-WT: Mg <sup>2+</sup> /THY (Log2 FC) | M1-CovS-WT: Mg <sup>2+</sup> /THY (adj pvalue) | M1-Cov-Y39H : Mg <sup>2+</sup> /THY (Log2 FC) | M1-Cov-Y39H : Mg <sup>2+</sup> /THY (adj pvalue) | Hypothetical/proposed function                                                  |
|-------------------|----------|-------------|-----------------------------------|--------------------------------------|---------------------------------------------|------------------------------------------------|-----------------------------------------------|--------------------------------------------------|---------------------------------------------------------------------------------|
| SP119_1696        | SPy_2019 | <i>mga</i>  | -0.9                              | 0.0064                               | -1.5                                        | 3.85E-08                                       | -0.2                                          | 0.96                                             | M trans-acting positive regulator (MGA) PRD domain protein                      |
| SP119_0236        | SPy_0291 | <i>php7</i> | -0.9                              | 0.0062                               | -1.4                                        | 1.74E-07                                       | -0.1                                          | 0.99                                             | D-alanyl-D-alanine carboxypeptidase family protein                              |
| SP119_1368        | SPy_1673 | —           | -0.9                              | 0.0190                               | -1.2                                        | 0.0002                                         | 0.1                                           | 0.98                                             | putative membrane protein                                                       |
| SP119_1485        | SPy_1748 | <i>fabF</i> | -0.7                              | 0.0117                               | -1.1                                        | 1.11E-05                                       | -0.7                                          | 0.34                                             | 3-oxoacyl-[acyl-carrier-protein] synthase 2                                     |
| SP119_1484        | SPy_1747 | <i>accB</i> | -0.7                              | 0.0088                               | -1.2                                        | 1.45E-07                                       | -0.7                                          | 0.25                                             | acetyl-CoA carboxylase, biotin carboxyl carrier protein                         |
| SP119_1482        | SPy_1745 | <i>accC</i> | -0.7                              | 0.0221                               | -1.2                                        | 1.74E-06                                       | -0.6                                          | 0.34                                             | acetyl-CoA carboxylase, biotin carboxylase                                      |
| SP119_0859        | —        | <i>ydfG</i> | 0.7                               | 0.0284                               | 1.2                                         | 3.51E-06                                       | 0.1                                           | 0.99                                             | NADP-dependent 3-hydroxy acid dehydrogenase YdfG                                |
| SP119_0447        | SPy_0574 | <i>bgIH</i> | 0.8                               | 0.0078                               | 1.7                                         | 3.35E-13                                       | 0.1                                           | 0.98                                             | aryl-phospho-beta-D-glucosidase BgIH                                            |
| SP119_1235        | SPy_1503 | <i>pgm</i>  | 0.8                               | 0.0197                               | 1.7                                         | 3.22E-09                                       | -0.6                                          | 0.60                                             | phosphoglucomutase/phosphomannomutase, alpha/beta/alpha domain I family protein |
| SP119_0680        | SPy_0853 | <i>fruR</i> | 0.9                               | 0.0060                               | 1.3                                         | 5.99E-06                                       | -0.3                                          | 0.75                                             | deoR-like helix-turn-helix domain protein                                       |

24

25

26 c) Genes differentially expressed in Mg<sup>2+</sup> supplemented THY in M1-CovS-WT strain (FC>2 and adjusted  
 27 p-values ≤ 0.05) and not differentially expressed in M1-CovS-Y39H/ M1-CovS-WT comparisons (FC <2  
 28 and adjusted p-values >0.05)

| M1-CovS-WT (S119) | SF370    | locus              | M1-Cov-Y39H/ M1-CovS-WT (Log2 FC) | M1-Cov-Y39H/ M1-CovS-WT (adj pvalue) | M1-CovS-WT: Mg <sup>2+</sup> /THY (Log2 FC) | M1-CovS-WT: Mg <sup>2+</sup> /THY (adj pvalue) | M1-Cov-Y39H : Mg <sup>2+</sup> /THY (Log2 FC) | M1-Cov-Y39H : Mg <sup>2+</sup> /THY (adj pvalue) | Hypothetical/proposed function                             |
|-------------------|----------|--------------------|-----------------------------------|--------------------------------------|---------------------------------------------|------------------------------------------------|-----------------------------------------------|--------------------------------------------------|------------------------------------------------------------|
| SP119_1668        | SPy_1983 | <i>sclA</i>        | -3.0                              | NA                                   | -3.5                                        | 0.0006                                         | 1.5                                           | 0.709                                            | LPXTG-motif cell wall anchor domain protein                |
| SP119_1707        | SPy_2036 | —                  | -0.7                              | 0.4683                               | -3.4                                        | 2.98E-07                                       | 0.7                                           | 0.790                                            | hypothetical protein                                       |
| SP119_1171        | —        | —                  | -1.7                              | NA                                   | -2.6                                        | 0.0482                                         | 0.1                                           | 0.999                                            | hypothetical protein                                       |
| SP119_0906        | SPy_1180 | <i>citN</i>        | -0.5                              | 0.4606                               | -2.3                                        | 4.66E-06                                       | 0.4                                           | 0.915                                            | citrate transporter                                        |
| SP119_0146        | SPy_0174 | <i>ulaA</i>        | -0.1                              | 0.8699                               | -2.1                                        | 0.0010                                         | 0.2                                           | 0.993                                            | ascorbate-specific permease IIC component ulaA             |
| SP119_1552        | SPy_1834 | —                  | -0.3                              | NA                                   | -2.0                                        | 0.0494                                         | 1.4                                           | 0.708                                            | helix-turn-helix family protein                            |
| SP119_1094        | SPy_1339 | —                  | -0.7                              | 0.2181                               | -2.0                                        | 5.99E-06                                       | 0.9                                           | 0.604                                            | thioesterase superfamily protein                           |
| SP119_1469        | SPy_1731 | —                  | -0.9                              | 0.0660                               | -1.8                                        | 6.25E-07                                       | 0.5                                           | 0.730                                            | hypothetical protein                                       |
| SP119_0583        | SPy_0738 | <i>sagA</i>        | -0.8                              | 0.1731                               | -1.8                                        | 0.0002                                         | 0.8                                           | 0.610                                            | bacteriocin protoxin, streptolysin S family protein        |
| SP119_1388        | SPy_1699 | <i>acrR</i>        | -0.8                              | 0.2006                               | -1.7                                        | 0.0007                                         | 0.7                                           | 0.677                                            | bacterial regulatory s, tetR family protein                |
| SP119_1468        | SPy_1730 | <i>hit</i>         | -0.3                              | 0.6465                               | -1.7                                        | 0.0010                                         | 0.6                                           | 0.746                                            | protein hit                                                |
| SP119_0888        | SPy_1160 | —                  | -0.7                              | 0.1175                               | -1.7                                        | 6.25E-07                                       | 0.4                                           | 0.710                                            | hypothetical protein                                       |
| SP119_1215        | —        | —                  | -0.6                              | 0.3144                               | -1.5                                        | 0.0015                                         | 0.8                                           | 0.609                                            | hypothetical protein                                       |
| SP119_0356        | SPy_0459 | —                  | -0.5                              | 0.4477                               | -1.4                                        | 0.0096                                         | 1.0                                           | 0.604                                            | putative membrane protein                                  |
| SP119_0909        | SPy_1184 | <i>gcdB</i>        | -0.1                              | 0.8878                               | -1.4                                        | 0.0031                                         | 0.2                                           | 0.978                                            | glutaconyl-CoA decarboxylase subunit beta                  |
| SP119_1411        | —        | <i>sdaD2/ sdaI</i> | -1.0                              | 0.0855                               | -1.4                                        | 0.0031                                         | 0.0                                           | 0.999                                            | streptodornase SdaD2                                       |
| SP119_1706        | SPy_2034 | —                  | -0.4                              | 0.5367                               | -1.4                                        | 0.0034                                         | 0.2                                           | 0.978                                            | hypothetical protein                                       |
| SP119_1693        | —        | —                  | -0.9                              | 0.0551                               | -1.3                                        | 0.0007                                         | 0.3                                           | 0.854                                            | transposase                                                |
| SP119_1829        | —        | —                  | -0.7                              | 0.2289                               | -1.3                                        | 0.0087                                         | 1.2                                           | 0.340                                            | hypothetical protein                                       |
| SP119_1747        | SPy_2089 | <i>hutH</i>        | -0.6                              | 0.4222                               | -1.3                                        | 0.0194                                         | 0.5                                           | 0.790                                            | histidine ammonia-lyase                                    |
| SP119_0350        | SPy_0450 | <i>scar</i>        | -0.3                              | 0.6725                               | -1.3                                        | 0.0390                                         | 0.7                                           | 0.709                                            | Mn-dependent transcriptional regulator                     |
| SP119_1795        | SPy_2169 | —                  | -0.8                              | 0.0796                               | -1.3                                        | 0.0011                                         | 0.6                                           | 0.642                                            | hypothetical protein                                       |
| SP119_1126        | SPy_1379 | —                  | 0.1                               | 0.8615                               | -1.3                                        | 0.0413                                         | 0.6                                           | 0.763                                            | voltage gated chloride channel family protein              |
| SP119_0181        | SPy_0216 | <i>rivR</i>        | -0.3                              | 0.6176                               | -1.3                                        | 0.0045                                         | 0.6                                           | 0.682                                            | M trans-acting positive regulator (MGA) PRD domain protein |
| SP119_0737        | —        | —                  | -0.7                              | 0.3714                               | -1.3                                        | 0.0465                                         | 1.1                                           | 0.524                                            | hypothetical protein                                       |
| SP119_0868        | SPy_1139 | —                  | -0.6                              | 0.3079                               | -1.3                                        | 0.0172                                         | 1.2                                           | 0.340                                            | tautomerase enzyme family protein                          |
| SP119_0887        | SPy_1159 | <i>hlyIII</i>      | -0.3                              | 0.5914                               | -1.3                                        | 0.0081                                         | 0.5                                           | 0.718                                            | channel, hemolysin III family protein                      |
| SP119_0133        | SPy_0159 | <i>sihA</i>        | -0.7                              | 0.0956                               | -1.2                                        | 0.0009                                         | 0.0                                           | 0.994                                            | putative membrane associated protein                       |
| SP119_0718        | SPy_0898 | <i>cpsY</i>        | -0.4                              | 0.4199                               | -1.2                                        | 0.0003                                         | 0.5                                           | 0.677                                            | bacterial regulatory helix-turn-helix, lysR family protein |
| SP119_0458        | SPy_0589 | —                  | -0.6                              | 0.2319                               | -1.2                                        | 0.0081                                         | 1.0                                           | 0.340                                            | hypothetical protein                                       |
| SP119_1748        | SPy_2090 | <i>hutG</i>        | -0.3                              | 0.7226                               | -1.2                                        | 0.0266                                         | 0.7                                           | 0.678                                            | formimidoylglutamate                                       |
| SP119_0037        | SPy_0042 | —                  | -0.8                              | 0.0578                               | -1.2                                        | 0.0005                                         | 0.0                                           | 1.000                                            | aldehyde-alcohol dehydrogenase 2                           |
| SP119_0463        | —        | —                  | -0.3                              | 0.6603                               | -1.2                                        | 0.0342                                         | 0.6                                           | 0.710                                            | putative membrane protein                                  |
| SP119_1115        | SPy_1366 | —                  | -0.2                              | 0.7451                               | -1.2                                        | 0.0143                                         | 0.8                                           | 0.604                                            | putative membrane protein                                  |
| SP119_0364        | SPy_0469 | —                  | -0.6                              | 0.2090                               | -1.2                                        | 0.0037                                         | 0.2                                           | 0.978                                            | lysM domain protein                                        |
| SP119_1770        | SPy_2115 | <i>spxA</i>        | -0.9                              | 0.1321                               | -1.2                                        | 0.0480                                         | 0.9                                           | 0.609                                            | regulatory protein spx                                     |
| SP119_1386        | SPy_1697 | —                  | -0.5                              | 0.4145                               | -1.2                                        | 0.0081                                         | 0.2                                           | 0.960                                            | putative lipoprotein                                       |
| SP119_1796        | SPy_2170 | —                  | 0.2                               | 0.8116                               | -1.2                                        | 0.0466                                         | 0.6                                           | 0.748                                            | NUDIX domain protein                                       |

29

|            |          |              |      |        |      |          |      |       |                                                                   |
|------------|----------|--------------|------|--------|------|----------|------|-------|-------------------------------------------------------------------|
| SP119_0108 |          |              | -0.5 | 0.3447 | -1.1 | 0.0046   | 0.3  | 0.892 | transposase IS66                                                  |
| SP119_1463 |          |              | 0.5  | 0.5052 | -1.1 | 0.0485   | 1.0  | 0.604 | site-specific integrase                                           |
| SP119_0484 | SPy_0621 |              | -0.8 | 0.0834 | -1.1 | 0.0059   | 0.5  | 0.709 | HD domain protein                                                 |
| SP119_1284 |          |              | -1.0 | 0.0990 | -1.1 | 0.0485   | 0.4  | 0.899 | CRISPR-associated protein CasI                                    |
| SP119_1483 | SPy_1746 | <i>fabZ</i>  | -0.7 | 0.0516 | -1.1 | 5.75E-05 | -0.5 | 0.604 | beta-hydroxyacyl-(acyl-carrier-protein) dehydratase FabZ          |
| SP119_1581 | SPy_1870 |              | 0.5  | 0.4452 | -1.1 | 0.0346   | 0.8  | 0.604 | bacterial regulatory s_gntR family protein                        |
| SP119_0172 | SPy_0205 |              | -0.5 | 0.2249 | -1.1 | 0.0004   | 0.7  | 0.464 | putative membrane protein                                         |
| SP119_0324 | SPy_0414 | <i>lctO</i>  | -0.4 | 0.2433 | -1.1 | 9.35E-06 | -0.2 | 0.846 | L-lactate oxidase                                                 |
| SP119_1056 | SPy_1290 |              | -0.3 | 0.6872 | -1.1 | 0.0230   | 0.4  | 0.832 | DUF3862 domain-containing protein                                 |
| SP119_1479 | SPy_1742 | <i>serS</i>  | -0.9 | 0.0554 | -1.1 | 0.0139   | 0.7  | 0.610 | seryl-tRNA synthetase                                             |
| SP119_0903 | SPy_1177 |              | -0.2 | 0.7018 | -1.1 | 0.0053   | 0.4  | 0.791 | glutaconyl-CoA decarboxylase subunit beta                         |
| SP119_0650 | SPy_0815 |              | -0.5 | 0.2631 | -1.0 | 0.0062   | 0.2  | 0.945 | hypothetical protein                                              |
| SP119_0408 | SPy_0527 |              | -0.3 | 0.5724 | -1.0 | 0.0018   | 0.6  | 0.604 | putative cytoplasmic protein                                      |
| SP119_0570 | SPy_0722 |              | -0.5 | 0.2433 | -1.0 | 0.0042   | 0.1  | 0.993 | chorismate mutase                                                 |
| SP119_0948 | SPy_1230 | <i>cdt</i>   | 0.7  | 0.1480 | 1.0  | 0.0267   | 0.1  | 0.993 | cytidine deaminase                                                |
| SP119_0932 | SPy_1213 | <i>fhsI</i>  | 0.5  | 0.0701 | 1.0  | 1.29E-06 | -0.2 | 0.779 | formate-tetrahydrofolate ligase I                                 |
| SP119_0155 | SPy_0184 | <i>busAB</i> | 0.0  | 0.9936 | 1.0  | 5.12E-05 | 0.0  | 0.993 | betaine ABC transporter permease and substrate binding protein    |
| SP119_0630 | SPy_0793 |              | 1.0  | 0.0516 | 1.0  | 0.0318   | -0.2 | 0.960 | sulfatase family protein                                          |
| SP119_0715 | SPy_0892 | <i>punA</i>  | 0.1  | 0.8494 | 1.0  | 0.0027   | -0.6 | 0.609 | purine nucleoside phosphorylase I, inosine and guanosine-specific |
| SP119_0552 |          |              | 0.6  | 0.1902 | 1.0  | 0.0029   | -0.1 | 0.975 |                                                                   |
| SP119_0633 | SPy_0797 | <i>amrA</i>  | 0.7  | 0.1297 | 1.0  | 0.0058   | -0.1 | 0.984 | polysaccharide biosynthesis family protein                        |
| SP119_1402 | SPy_1717 | <i>copY</i>  | 0.1  | 0.8840 | 1.1  | 0.0049   | 0.2  | 0.930 | Negative transcriptional regulator-copper transport operon        |
| SP119_0073 | SPy_0092 | <i>adcR</i>  | 0.3  | 0.6165 | 1.1  | 0.0045   | -0.4 | 0.748 | transcriptional repressor AdcR                                    |
| SP119_0931 | SPy_1212 | <i>cls</i>   | 0.5  | 0.2646 | 1.1  | 0.0031   | -0.5 | 0.708 | phospholipase D Active site motif family protein                  |
| SP119_0682 | SPy_0855 | <i>fruA</i>  | 0.3  | 0.4199 | 1.1  | 0.0001   | 0.0  | 0.995 | PTS system, fructose subfamily, IIA component domain protein      |
| SP119_0745 | SPy_0928 |              | 0.1  | 0.9325 | 1.1  | 0.0465   | -0.8 | 0.609 | hypothetical protein                                              |
| SP119_0301 | SPy_0379 | <i>pflA</i>  | 0.5  | 0.2319 | 1.1  | 0.0031   | -0.5 | 0.708 | pyruvate formate-lyase I-activating enzyme                        |
| SP119_0795 | SPy_1061 |              | 0.1  | 0.8245 | 1.2  | 0.0002   | -0.3 | 0.806 | histidine kinase family protein                                   |
| SP119_0683 | SPy_0856 | <i>murI</i>  | 0.9  | 0.1829 | 1.2  | 0.0414   | 0.2  | 0.975 | mannosyl-glycoendo-beta-N-acetylglucosaminidase family protein    |
| SP119_0864 | SPy_1135 | <i>guaC</i>  | 0.5  | 0.3447 | 1.2  | 0.0017   | 0.1  | 0.993 | guanosine monophosphate reductase                                 |
| SP119_0405 | SPy_0521 | <i>gacY</i>  | 0.7  | 0.1920 | 1.2  | 0.0053   | 0.3  | 0.913 | ABC-type multidrug transport system, permease component           |
| SP119_1417 |          |              | -0.1 | 0.9151 | 1.2  | 0.0008   | 0.2  | 0.934 | hypothetical protein                                              |
| SP119_0938 | SPy_1219 | <i>yqiG</i>  | 0.5  | 0.1485 | 1.2  | 1.38E-05 | -0.4 | 0.708 | NADH:flavin oxidoreductase / NADH oxidase family protein          |
| SP119_1420 |          |              | 0.6  | 0.2836 | 1.2  | 0.0083   | -0.1 | 0.993 | peptidase                                                         |
| SP119_0791 | SPy_1057 |              | 0.2  | 0.7740 | 1.2  | 0.0005   | -0.6 | 0.604 | PTS system fructose IIA component family protein                  |
| SP119_0196 | SPy_0244 | <i>fasC</i>  | 0.9  | 0.1421 | 1.2  | 0.0215   | -0.4 | 0.882 | sensor histidine kinase FasC                                      |
| SP119_1060 | SPy_1294 | <i>malE</i>  | -0.1 | 0.9081 | 1.2  | 0.0170   | -0.2 | 0.962 | bacterial extracellular solute-binding family protein             |
| SP119_1412 |          | <i>amiD9</i> | -0.3 | 0.6931 | 1.3  | 0.0049   | 0.3  | 0.934 | phage associated protein                                          |
| SP119_1425 |          |              | -0.1 | 0.9290 | 1.3  | 0.0021   | 0.4  | 0.779 | phage major tail protein, TP901-1 family                          |
| SP119_1059 | SPy_1293 | <i>malR</i>  | 0.7  | 0.1256 | 1.3  | 0.0004   | -0.6 | 0.642 | bacterial regulatory s_lacI family protein                        |
| SP119_0947 | SPy_1228 | <i>tmbC</i>  | 0.6  | 0.2191 | 1.3  | 0.0004   | -0.5 | 0.709 | basic membrane family protein                                     |
| SP119_1689 | SPy_2007 | <i>lmb</i>   | 0.7  | 0.1099 | 1.3  | 0.0002   | -0.2 | 0.935 | laminin binding protein                                           |
| SP119_1229 | SPy_1496 | <i>argR3</i> | 0.8  | 0.1286 | 1.3  | 0.0040   | -0.8 | 0.604 | arginine repressor, DNA binding domain protein                    |
| SP119_1418 |          |              | 0.3  | 0.7445 | 1.3  | 0.0188   | 0.1  | 0.993 | hypothetical protein                                              |
| SP119_1415 |          |              | 0.1  | 0.8775 | 1.3  | 6.17E-05 | 0.0  | 0.993 | hypothetical protein                                              |
| SP119_1306 | SPy_1592 |              | 1.1  | 0.1495 | 1.3  | 0.0396   | -0.7 | 0.718 | bacterial extracellular solute-binding family protein             |
| SP119_1662 | SPy_1973 | <i>dexB</i>  | 0.3  | 0.6396 | 1.3  | 0.0005   | -0.1 | 0.993 | glucan 1,6-alpha-glucosidase                                      |
| SP119_0544 |          |              | 0.4  | 0.6480 | 1.3  | 0.0072   | 0.1  | 0.993 |                                                                   |
| SP119_0936 | SPy_1217 | <i>gcvH2</i> | 0.5  | 0.2579 | 1.4  | 7.04E-05 | -0.2 | 0.957 | glycine cleavage H-family protein                                 |
| SP119_0955 | SPy_1240 | <i>phoU</i>  | 1.2  | 0.0505 | 1.4  | 0.0064   | -0.7 | 0.682 | phosphate transport system regulatory protein PhoU                |
| SP119_0844 | SPy_1113 | <i>aphA</i>  | 0.9  | 0.0736 | 1.4  | 0.0004   | -0.2 | 0.957 | class B acid phosphatase                                          |
| SP119_0404 | SPy_0519 |              | 0.7  | 0.2133 | 1.4  | 0.0020   | -0.1 | 0.993 | hypothetical protein                                              |
| SP119_1421 |          |              | 0.4  | 0.5975 | 1.4  | 0.0025   | 0.0  | 1.000 | hypothetical protein                                              |
| SP119_0935 | SPy_1216 |              | 0.6  | 0.1421 | 1.4  | 1.98E-05 | -0.2 | 0.894 | macro domain protein                                              |
| SP119_0403 | SPy_0518 | <i>tagH</i>  | 0.7  | 0.1047 | 1.4  | 9.50E-05 | -0.4 | 0.790 | ABC transporter family protein                                    |
| SP119_1578 | SPy_1867 | <i>deoC</i>  | 0.8  | 0.0740 | 1.4  | 3.58E-05 | -0.9 | 0.340 | deoxyribose-phosphate aldolase                                    |
| SP119_1414 |          |              | 0.5  | 0.4560 | 1.4  | 0.0027   | 0.2  | 0.951 | hypothetical protein                                              |
| SP119_0937 | SPy_1218 |              | 0.4  | 0.4211 | 1.5  | 3.65E-06 | -0.6 | 0.604 | luciferase oxidoreductase, group I family protein                 |
| SP119_0543 |          |              | 1.0  | 0.1050 | 1.5  | 0.0036   | -0.2 | 0.984 |                                                                   |
| SP119_0549 |          |              | 0.3  | 0.7022 | 1.5  | 0.0031   | 0.3  | 0.866 |                                                                   |
| SP119_1413 |          |              | 0.3  | 0.6176 | 1.5  | 0.0003   | 0.3  | 0.891 | hypothetical protein                                              |
| SP119_1426 |          |              | 0.2  | 0.8373 | 1.5  | 0.0082   | 0.6  | 0.741 | hypothetical protein                                              |
| SP119_0793 | SPy_1059 | <i>ptsC</i>  | 0.5  | 0.2266 | 1.5  | 4.96E-06 | -0.3 | 0.844 | PTS system sorbose-specific iic component family protein          |
| SP119_0792 | SPy_1058 | <i>ptsB</i>  | 0.3  | 0.6080 | 1.5  | 5.12E-05 | -0.7 | 0.604 | PTS system, mannose/fructose family IIB component                 |
| SP119_0934 | SPy_1215 |              | 0.5  | 0.2677 | 1.5  | 6.25E-07 | -0.5 | 0.694 | SIR2 family protein                                               |
| SP119_0545 |          |              | 1.7  | NA     | 1.6  | 0.0497   | 0.4  | 0.936 |                                                                   |
| SP119_1431 |          |              | 0.3  | 0.6065 | 1.6  | 1.13E-06 | 0.0  | 0.993 | DUF4355 domain-containing protein                                 |
| SP119_1429 |          |              | 0.3  | 0.7121 | 1.6  | 0.0054   | 0.0  | 1.000 | hypothetical protein                                              |
| SP119_1423 |          |              | 0.0  | NA     | 1.6  | 0.0483   | -0.8 | 0.748 | hypothetical protein                                              |
| SP119_1430 |          |              | 0.2  | 0.6745 | 1.7  | 2.96E-09 | 0.3  | 0.748 | hypothetical protein                                              |
| SP119_1434 |          |              | 1.2  | 0.0592 | 1.7  | 0.0005   | 0.7  | 0.642 | phage head morphogenesis protein                                  |
| SP119_1443 |          |              | 1.6  | 0.0528 | 1.7  | 0.0187   | 0.2  | 0.993 | ATP-dependent helicase                                            |
| SP119_0538 |          |              | 1.0  | NA     | 1.7  | 0.0417   | 0.3  | 0.948 |                                                                   |
| SP119_1419 |          |              | 0.9  | 0.0834 | 1.7  | 1.29E-06 | 0.1  | 0.993 | hypothetical protein                                              |
| SP119_0536 |          |              | 0.4  | NA     | 1.7  | 0.0342   | -0.1 | 0.993 |                                                                   |
| SP119_1428 |          |              | 0.6  | 0.4701 | 1.7  | 0.0014   | -0.3 | 0.934 | hypothetical protein                                              |
| SP119_1435 |          |              | 0.8  | 0.4591 | 1.8  | 0.0194   | 0.5  | 0.870 | phage portal protein                                              |
| SP119_0794 | SPy_1060 | <i>ptsD</i>  | 0.4  | 0.3816 | 1.8  | 8.59E-07 | -0.3 | 0.846 | PTS system mannose/fructose/sorbose IID component family protein  |
| SP119_0129 | SPy_0154 | <i>ntpA</i>  | 0.6  | 0.0958 | 1.8  | 1.98E-10 | -0.1 | 0.960 | V-type sodium ATPase catalytic subunit A                          |
| SP119_1270 | SPy_1543 |              | 0.0  | 0.9868 | 1.8  | 3.51E-08 | -0.2 | 0.893 | C4-dicarboxylate anaerobic carrier family protein                 |
| SP119_0796 | SPy_1062 |              | 1.0  | 0.2643 | 1.9  | 0.0057   | -0.2 | 0.993 | response regulator                                                |

|            |                |             |     |        |     |          |      |       |                                      |
|------------|----------------|-------------|-----|--------|-----|----------|------|-------|--------------------------------------|
| SP119_1269 | SPy_1542       | <i>arcT</i> | 0.4 | 0.4477 | 2.0 | 9.76E-09 | -0.4 | 0.748 | dipeptidase, family protein          |
| SP119_0130 | SPy_0155       | <i>ntpB</i> | 0.4 | 0.4053 | 2.1 | 9.37E-11 | -0.3 | 0.854 | V-type sodium ATPase subunit B       |
| SP119_1424 | —              | —           | 0.8 | 0.5241 | 2.1 | 0.0066   | -0.7 | 0.779 | hypothetical protein                 |
| SP119_0127 | SPy_0151       | <i>ntpC</i> | 0.7 | 0.1942 | 2.2 | 9.89E-09 | -0.2 | 0.975 | ATP synthase (C/AC39) subunit        |
| SP119_0124 | SPy_0148       | <i>ntpI</i> | 0.8 | 0.2272 | 2.2 | 5.57E-06 | 0.1  | 0.993 | V-type ATPase 116kDa subunit         |
| SP119_0131 | SPy_0157       | <i>ntpD</i> | 0.8 | 0.3759 | 2.5 | 9.33E-05 | -0.1 | 0.993 | V-type ATPase, D subunit             |
| SP119_1268 | SPy_1541       | <i>arcC</i> | 0.7 | 0.2733 | 2.5 | 1.41E-08 | -0.6 | 0.694 | carbamate kinase                     |
| SP119_1416 | —              | —           | 0.6 | NA     | 2.6 | 0.0267   | -0.4 | 0.975 | Ribosome maturation factor RimP      |
| SP119_0128 | SPy_0152<br>na | <i>ntpF</i> | 1.0 | NA     | 2.7 | 0.0030   | -0.6 | 0.844 | ATP synthase (F/14-kDa) subunit      |
| SP119_0126 | SPy_0150       | <i>ntpE</i> | 0.7 | NA     | 2.9 | 8.25E-05 | 0.1  | 0.993 | V-type sodium ATP synthase subunit E |
| SP119_0546 | —              | —           | 1.0 | NA     | 2.9 | 0.0450   | 0.4  | 0.978 |                                      |
| SP119_1179 | —              | —           | 0.1 | NA     | 3.0 | 0.0295   | 0.8  | 0.810 | hypothetical protein                 |
| SP119_0123 | SPy_0147       | —           | 2.2 | NA     | 3.9 | 0.0137   | -0.5 | 0.957 | hypothetical protein                 |
| SP119_1189 | —              | —           | 0.0 | NA     | 4.8 | 0.0066   | 0.7  | 0.902 | DUF4355 domain-containing protein    |
| SP119_1188 | —              | —           | 0.0 | NA     | 5.0 | 0.0066   | 0.3  | 0.993 | hypothetical protein                 |

31

32 The results are expressed as log<sub>2</sub> fold changes.

33 The corresponding p-values, after multiple testing adjustment procedure are indicated

34 green, genes that are under expressed in at least one of the conditions; orange, genes that are

35 overexpressed in at least one of the conditions

36
